# Supplementary material for: Tissue Transglutaminase Modulates Vascular Stiffness and Function Through Crosslinking‐Dependent and Crosslinking‐Independent Functions
Source: PubMed Central journal article supplement — J Am Heart Assoc. 2017 Feb 3;6(2):e004161. doi: 10.1161/JAHA.116.004161 (PMC5523743; doi:10.1161/jaha.116.004161), 2017-02-03
Supplement: JAH3-6-e004161-s001.pdf [file JAH3-6-e004161-s001.pdf]

# Supplemental Figure I

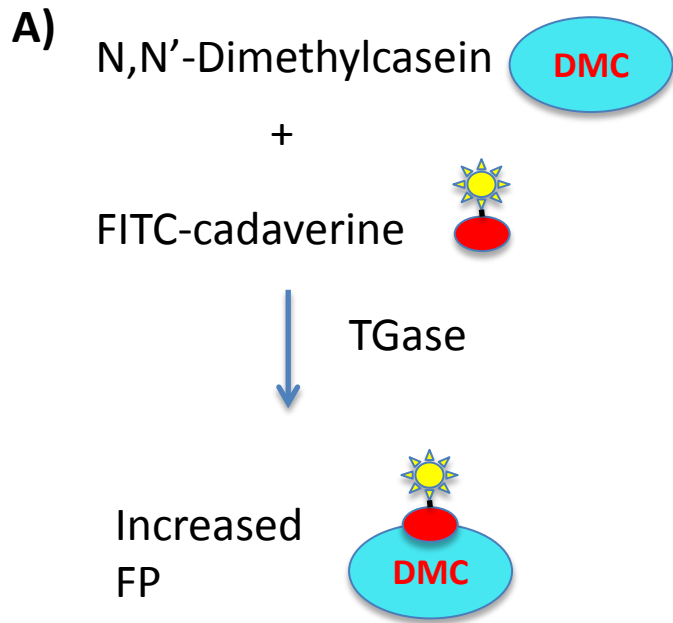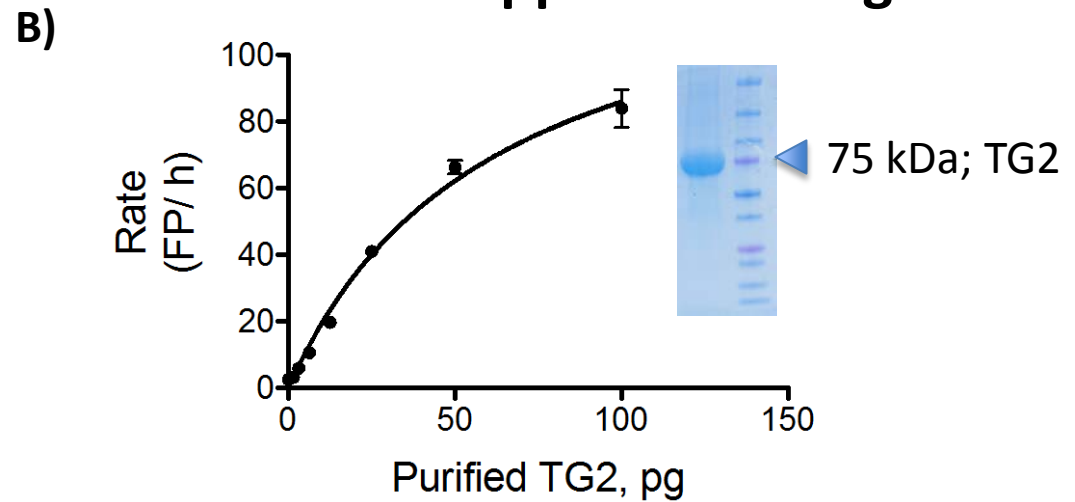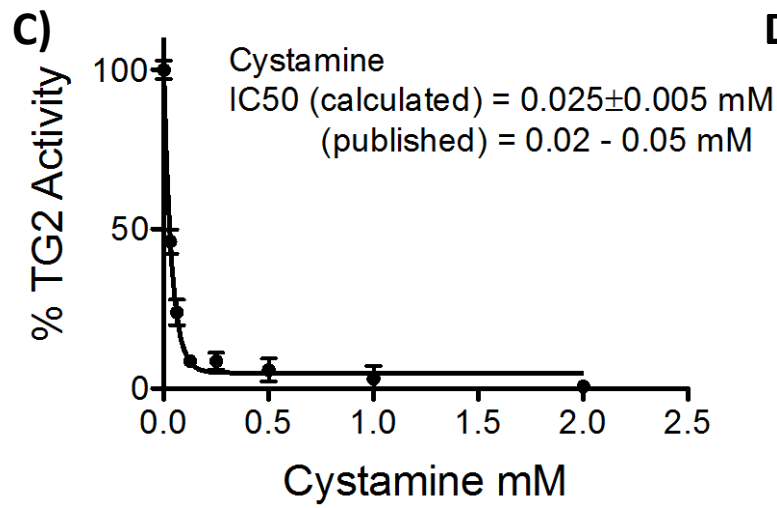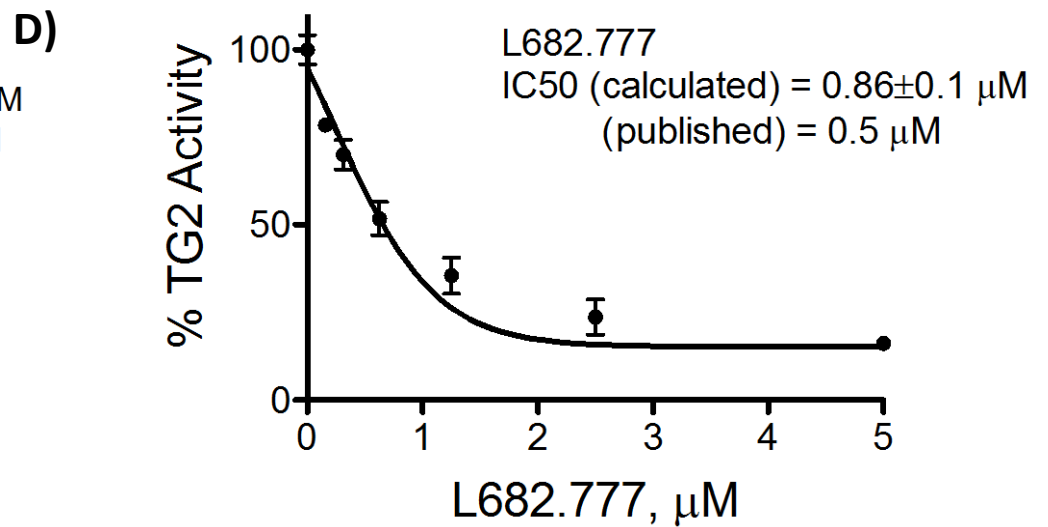

# Supplemental Figure I

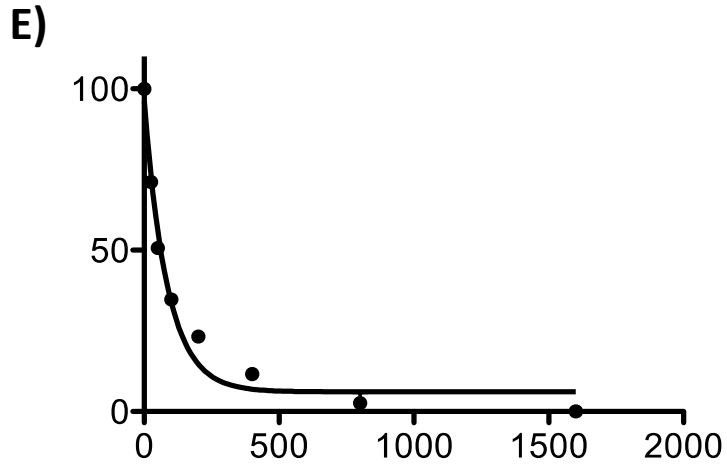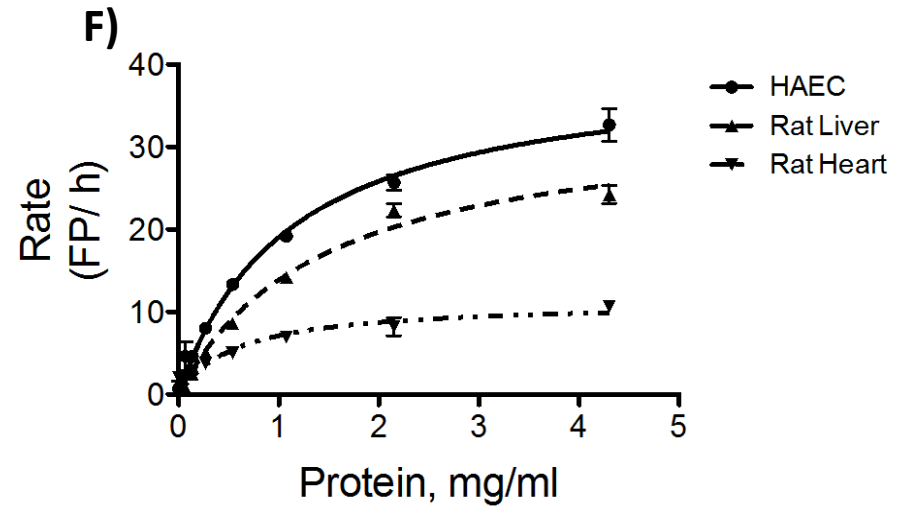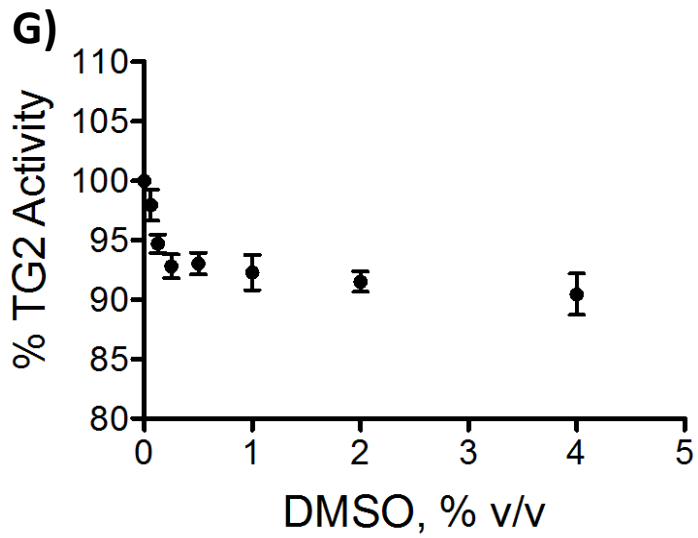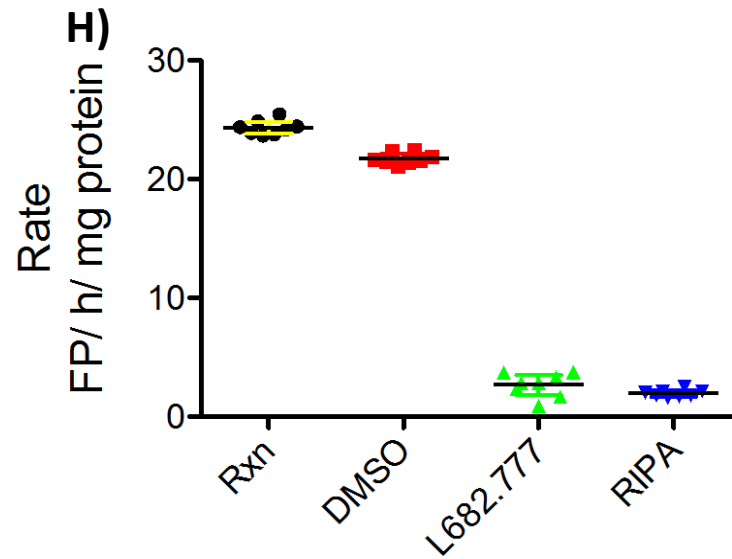

**Supplemental Figure I. Fluorescence polarization (FP)-based assay for transglutaminase (TG) activity.** **A**, The principle of the assay is that as the low molecular weight fluorescent molecule FITC-cadaverine is incorporated by transamidation into the high molecular weight N,N'-dimethylcasein, the FP signal of FITC-cadaverine increases. **B**, His-tagged recombinant human TG2 was expressed in HEK293 cells and purified with a BD-Talon purification kit before use. Representative Coomassie blue staining of the purified product is shown in the inset. FP signal increased with increasing TG2 protein in the reaction mixture. **C**, The  $IC_{50}$  of cystamine was calculated to be  $0.025 \pm 0.005$  mmol/L in the FP assay. This value is in good agreement with the published value of  $0.02 \pm 0.05$  mmol/L ( $n=12$  per group). **D**, The  $IC_{50}$  of L682.777 was calculated to be  $0.86 \pm 0.1$   $\mu$ mol/L, which is in good agreement with the value of  $0.5$   $\mu$ mol/L provided by the vendor (Zedira;  $n=12$  per group). **E**, Unlabeled cadaverine, which was used as a competitive inhibitor for FITC-cadaverine, had an  $IC_{50}$  of  $56 \pm 0.1$  nmol/L ( $n=12$  per group). **F**, The assay was used to examine activity in the protein lysates/homogenates obtained from human aortic endothelial cells (HAEC), rat liver, and rat heart prepared in 1x radioimmunoprecipitation assay (RIPA) lysis buffer with protease inhibitors. FP signal increased in a protein concentration-dependent manner in all of the samples ( $n=8$  per group). **G**, The assay tolerated DMSO up to 4% v/v with ~5-7% decrease in activity when compared with 0% DMSO. **H**, We evaluated the assay by carrying out 24 replicates each of baseline reaction (Rxn); 4% DMSO, 10  $\mu$ mol/L L682.777, and RIPA buffer negative control. The  $Z'$  values were 0.76 (Rxn vs. RIPA), 0.71 (Rxn vs. L682.777), 0.71 (DMSO vs. RIPA), and 0.62 (DMSO vs. L682.777). A  $Z'$  value of 0.5-1 represents a robust assay ( $n=24$  per group).

## Supplemental Figure II

WT MASMCM

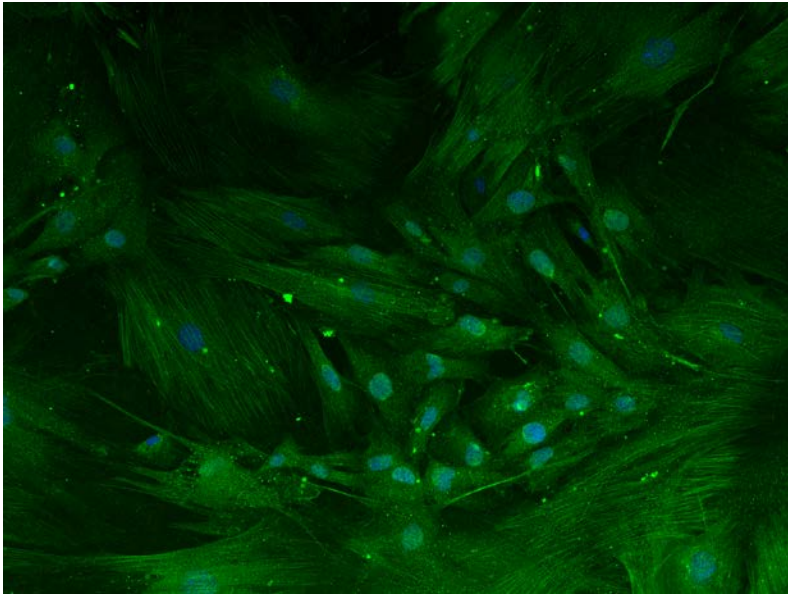

TG2<sup>-/-</sup> MASMCM

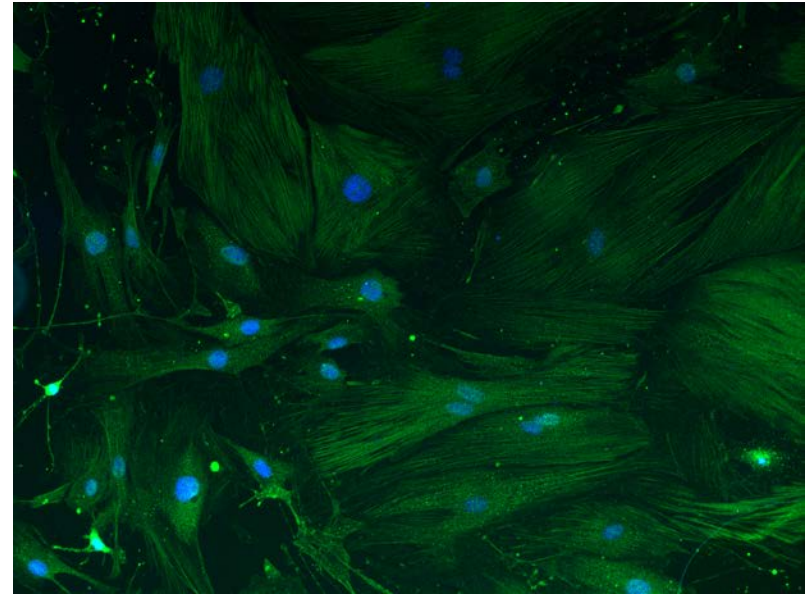

**Supplemental Figure II.** Smooth muscle cells (SMCs) isolated from TG2<sup>-/-</sup> and wild-type (WT) mouse aortae (MASMCM) were stained with smooth muscle actin to verify the quality of SMC isolation. More than 98% of the cells stained positive for smooth muscle actin. Images are representative of 10 SMC preparations.

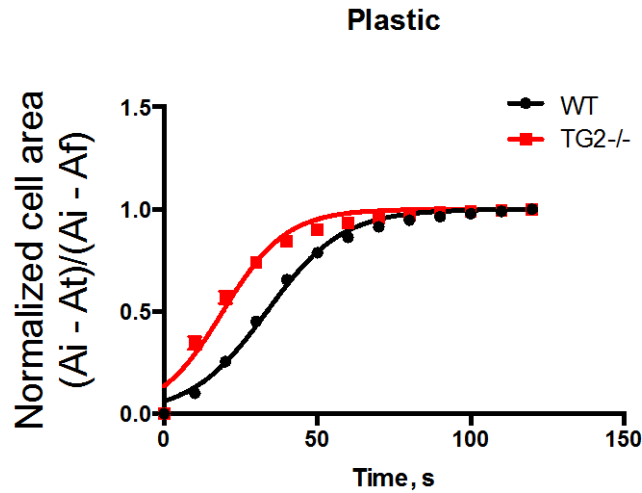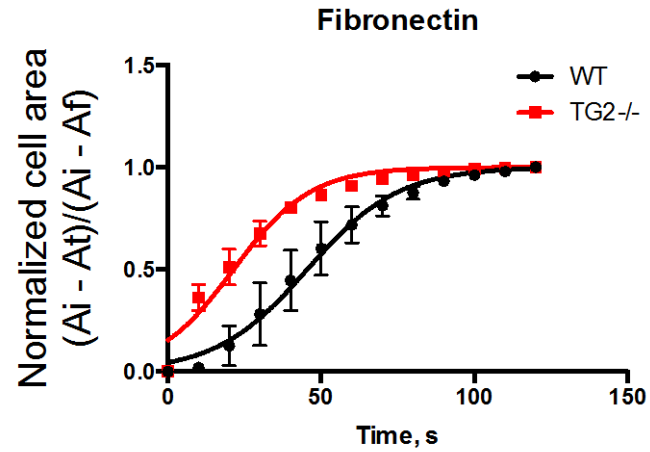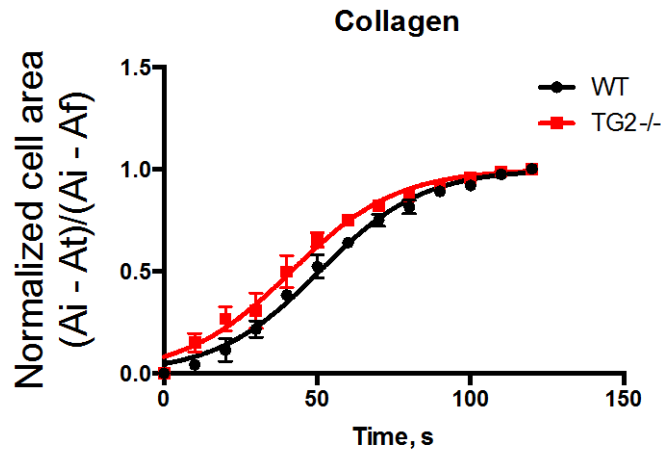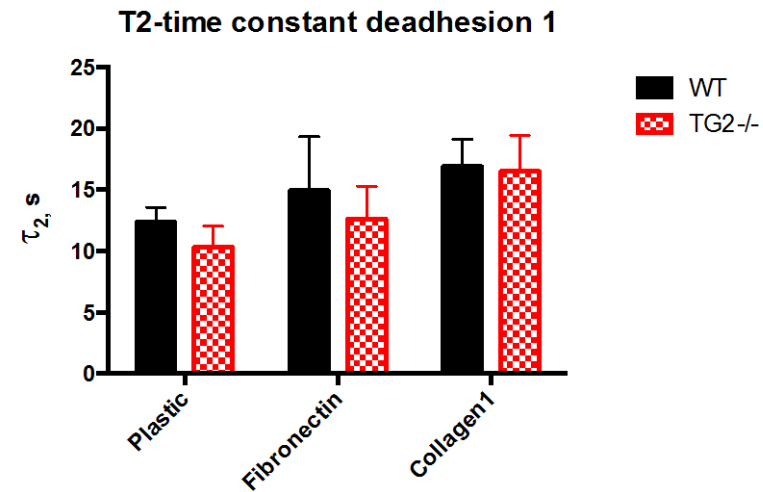

**Supplemental Figure III.** De-adhesion dynamics of TG2<sup>-/-</sup> and wild-type (WT) smooth muscle cells (SMCs) were examined by using 0.05% trypsin to sever the cell-matrix interactions. Time course of de-adhesion on **A**, tissue culture plastic; **B**, fibronectin; and **C**, collagen I-coated dishes. **D**, the  $\tau_2$  time constant of the de-adhesion curves was similar for TG2<sup>-/-</sup> and WT SMCs on all supports.  $A_i$  = initial spread area;  $A_t$  = spread area at time  $t$ ,  $A_f$  = final spread area.

## Supplemental Figure IV

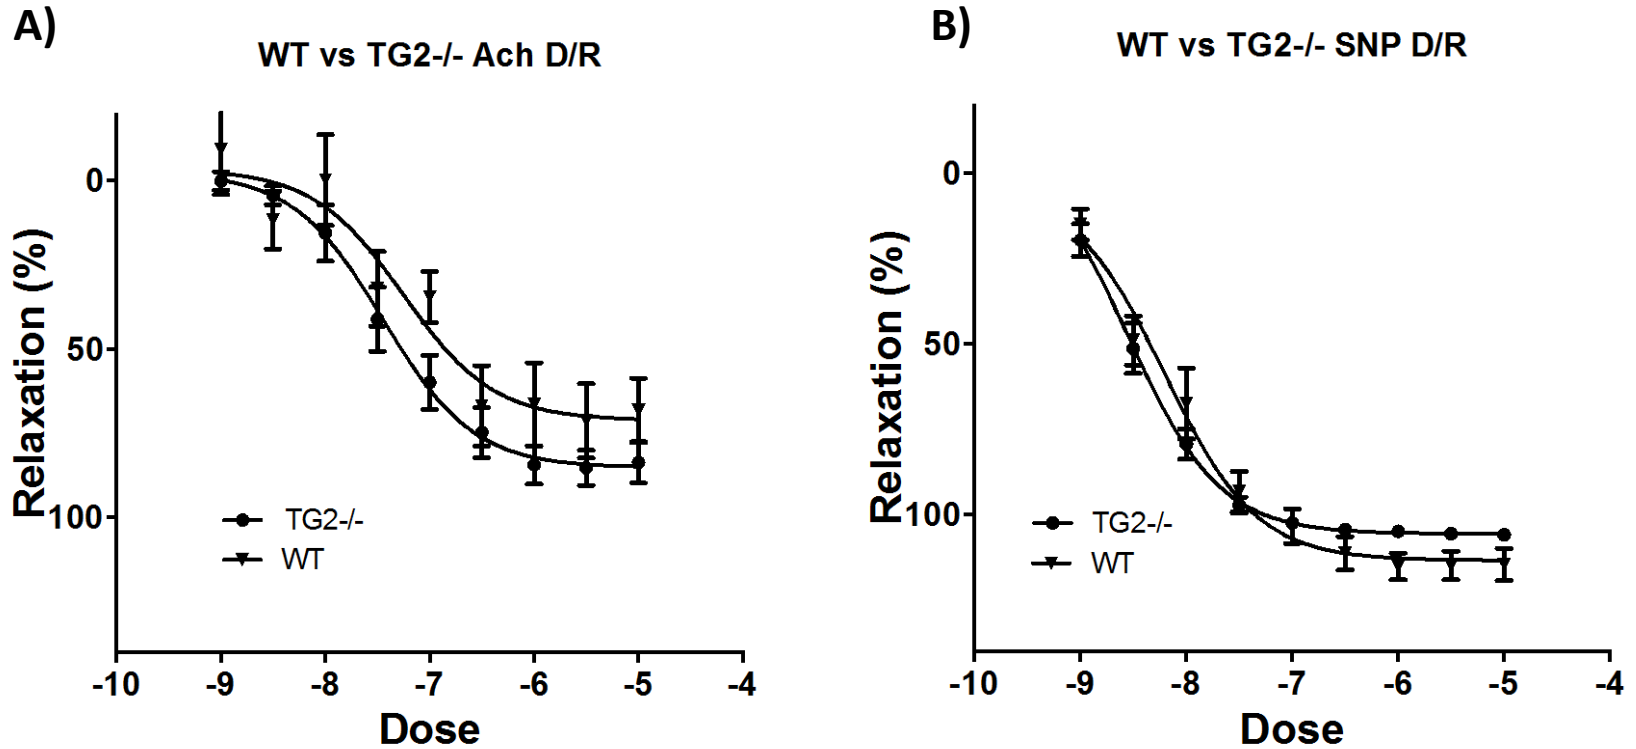

**Supplemental Figure IV.** Dose response (D/R) curves for induction of vasorelaxation by acetylcholine (Ach: **A**) and sodium nitroprusside (SNP; **B**) in aortic rings from wild-type (WT) and TG2<sup>-/-</sup> mice precontracted with phenylephrine. No difference is apparent between the two groups (n=8 per group). **C**, gpTG2 (10001) shares 81% sequence identity with rat TG2 (10003) and 82% with mouse TG2 (10002); rat and mouse TG2 share 93% sequence identity.

c)

|       |     |                                                                                   |     |
|-------|-----|-----------------------------------------------------------------------------------|-----|
| 10001 | 1   | MAEDLILERCDDLQLEVNGRDHRTADLCRERLVLRRGQPFWLTLLHFEGRGYEAGVDTLTFNAVTPGDPSEEAGTMARFSL | 80  |
| 10002 | 1   | MAEELLERCDDLEIQANGRDHHTADLCQEKLVLRGQRFRLTLYFEGRGYEASVDSLTFGAVTPGDPSEEAGTKARFSL    | 80  |
| 10003 | 1   | MAEELNLERCDDLEIQANGRDHHTADLCQEKLVLRGQRFRLTLYFEGRGYEASVDRLTFGAVTPGDPSEEAGTKARFSL   | 80  |
| 10001 | 81  | SAVEGGTWSASAVDQQDSTVSLLLSTPADAPIGLYRLSLEASTGYQGSFVLGHFILLYNPRCPADAVYMDSQERQYV     | 160 |
| 10002 | 81  | DNVEEGSWSASVLDQQDNVLSLQLCTPANAPIGLYRLSLEASTGYQGSFVLGHFILLYNPCPADDVYLDSEERREYV     | 160 |
| 10003 | 81  | DDVEEGSWSASVLDQQDNVLSLQLCTPANAPVGGYRLSLEASTGYQGSFVLGHFILLFNPCPADDVYLDSEERREYV     | 160 |
| 10001 | 161 | LTQQGFIYQGSAKFINGIPWNFGQFEDGILDICLMLLDTPNPKFLKNAGQDCSRRSRPVYVGRVVSAMVNCDDQGVQGR   | 240 |
| 10002 | 161 | LTQQGFIYQGSVKFKISVPWNFGQFEDGILDICLMLLDMPNPKFLKNRSRDCSRRSSPIYVGRVVSAMVNCDDQGVLLGR  | 240 |
| 10003 | 161 | LTQQGFIYQGSVKFKISVPWNFGQFEDGILDICLMLLDVNPVKFLKDRSRDCSRRSSPIYVGRVVSAMVNCDDQGVLLGR  | 240 |
| 10001 | 241 | WDNNSYSDGVSPMSWIGSVDILRRWKDYGCQRVKYGCQWVFAAVACTVLRCLGIPTRVVTNFNSAHDQNSNLLIEYFRNES | 320 |
| 10002 | 241 | WDNNSYSDGVSPMAWIGSVDILRRWKEHGCQVKYGCQWVFAAVACTVLRCLGIPTRVVTNNSAHDQNSNLLIEYFRNEF   | 320 |
| 10003 | 241 | WDNNSYSDGVSPMAWIGSVDILRRWKEHGCQVKYGCQWVFAAVACTVLRCLGIPTRVVTNNSAHDQNSNLLIEYFRNEY   | 320 |
| 10001 | 321 | GEIEGNKSEMIWNFHCWVESWMTRPDLQPGYEGWQALDPTPQEKSEGTYCCGPVSVRAIKEGHLNVKYDAPFVFAEVNAD  | 400 |
| 10002 | 321 | GELESNKSEMIWNFHCWVESWMTRPDLQPGYEGWQALDPTPQEKSEGTYCCGPVSVRAIKEGDLSTKYDAPFVFAEVNAD  | 400 |
| 10003 | 321 | GELESNKSEMIWNFHCWVESWMTRPDLQPGYEGWQALDPTPQEKSEGTYCCGPVSVRAIKEGDLSTKYDASVFAEVNAD   | 400 |
| 10001 | 401 | VVNWIROKDGSLRKSINH-LVVGLKISTKSVGRDREDITHYTYKPEGSSEEREAFVRANHLNKLATKeeaqEETGVAMR   | 479 |
| 10002 | 401 | VVDWIROEDGSVLKSNRSLVVGQKISTKSVGRDREDITHYTYKPEGSPEEREVFTKANHLNKLAEK----EETGVAMR    | 476 |
| 10003 | 401 | VVDWIROSDGSVLKSNRSLVVGQKISTKSVGRDREDITYTYKPEGSPEEREVFTKANHLNKLAEK----EETGVAMR     | 476 |
| 10001 | 480 | IRVGQNMVMGSDFDIFAYITNGTAESHQCQLLRCARIVSYNGVLGVCSTNDLNLTLDPFSENSIPLHILYKEYGDYLT    | 559 |
| 10002 | 477 | IRVGDSMSMGNDFDVFAHIGNDTSETRECRLLLCARTVSYNGVLGPECGTED-INLTLDPYSENSIPLRILYKEYSGCLT  | 555 |
| 10003 | 477 | IRVGDMSLGNDFDVFAHIGNDTSESRECRLLLCARTVSYNGVLGPECGTED-INLTLDPYSENSIPLRILYKEYSGCLT   | 555 |
| 10001 | 560 | ESNLIKVRGLLIEPAANSYVLAERDIYLENPEIKIRVLGEPKQNRKLVAEVSLKNPLPVPLGCIFTVEGAGLTKDQKSV   | 639 |
| 10002 | 556 | ESNLIKVRGLLIEPAANSYLLAERDLYLENPEIKIRVLGEPKQNRKLVAEVSLKNPLSDPLYDCIFTVEGAGLTKDQKSV  | 635 |
| 10003 | 556 | ESNLIKVRGLLIEPAANSYLLAERDLYLENPEIKIRILGEPKQNRKLVAEVSLKNPLSDSLYDCVFTVEGAGLTKDQKSV  | 635 |
| 10001 | 640 | EVPDPVEAGEQAKVRVDLLPTEVGLHKLNVNFECDKLVKAVGYRNVIIIGPA                              | 690 |
| 10002 | 636 | EVSDPVPAGDLVKARVDLFPDIDGLHKLNVNFCQDKLKSVMGYRNVIIIGPA                              | 686 |
| 10003 | 636 | EVSDPVPAGDAVKVRVDLFPDIDGLHKLNVNFCQDKLKSVMGYRNVIIIGPA                              | 686 |

# Supplemental Figure V

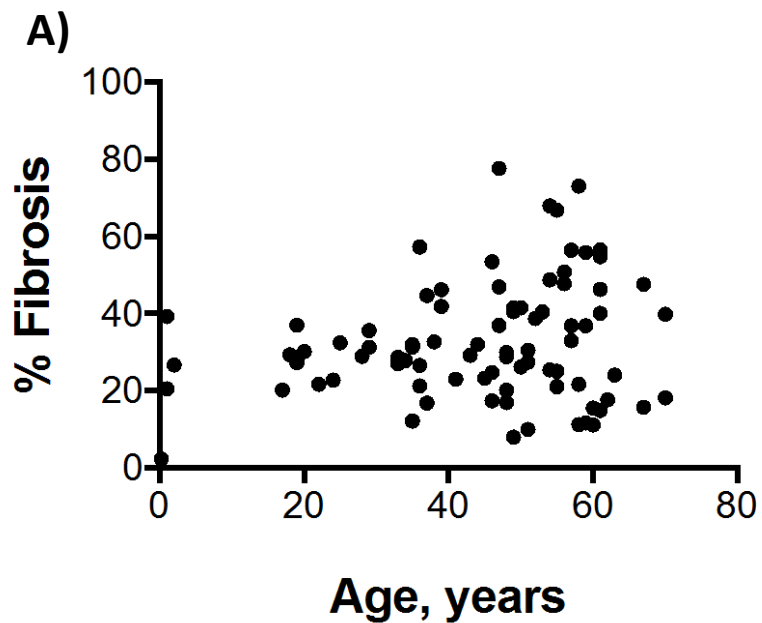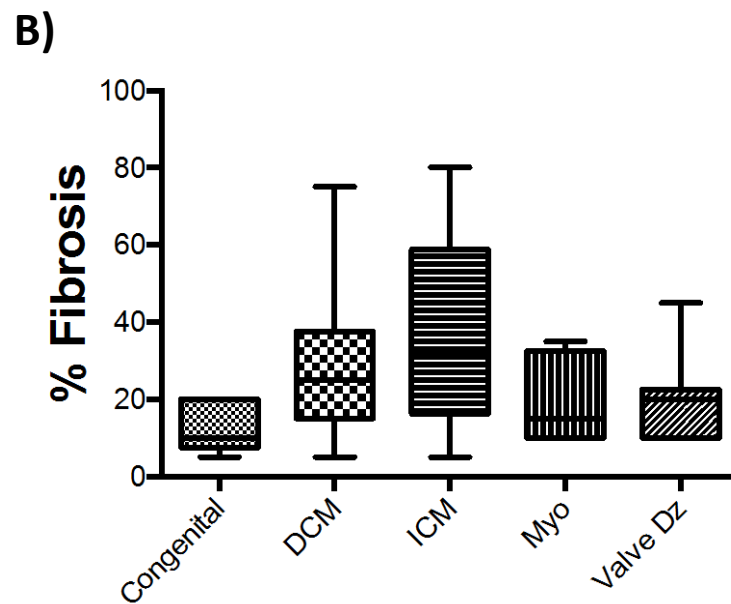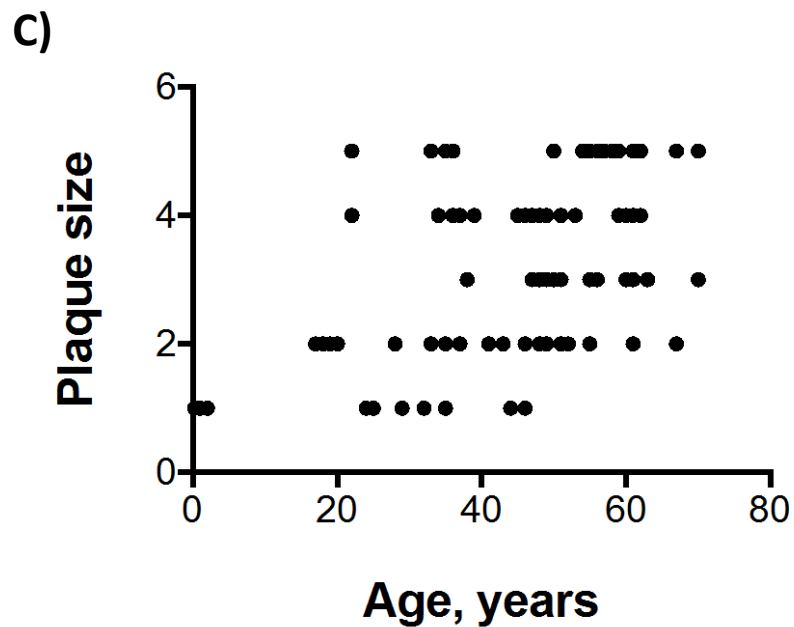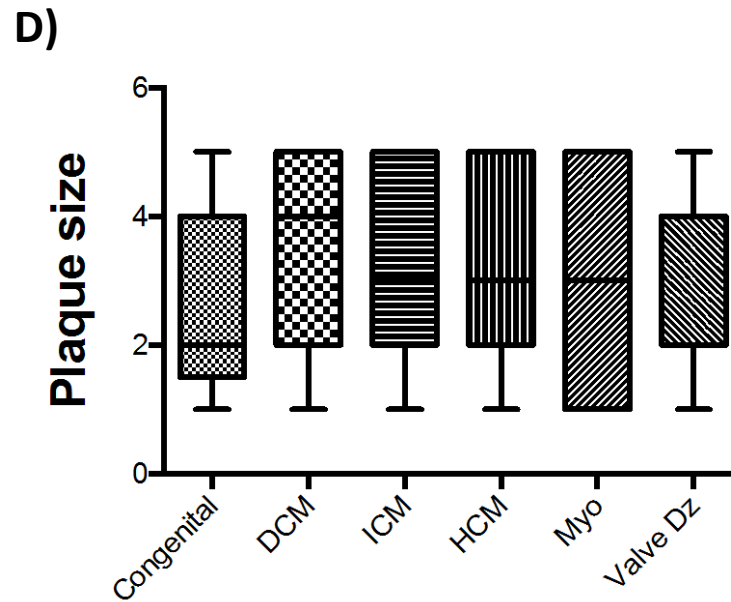



## Supplemental Figure V

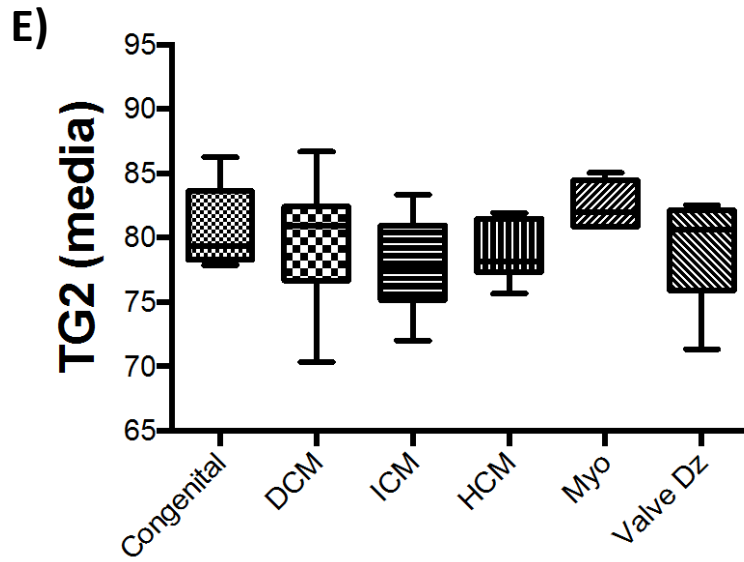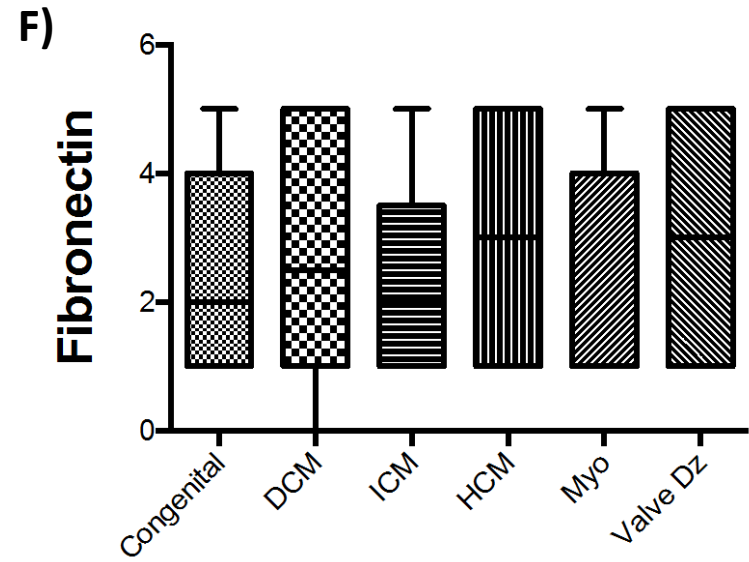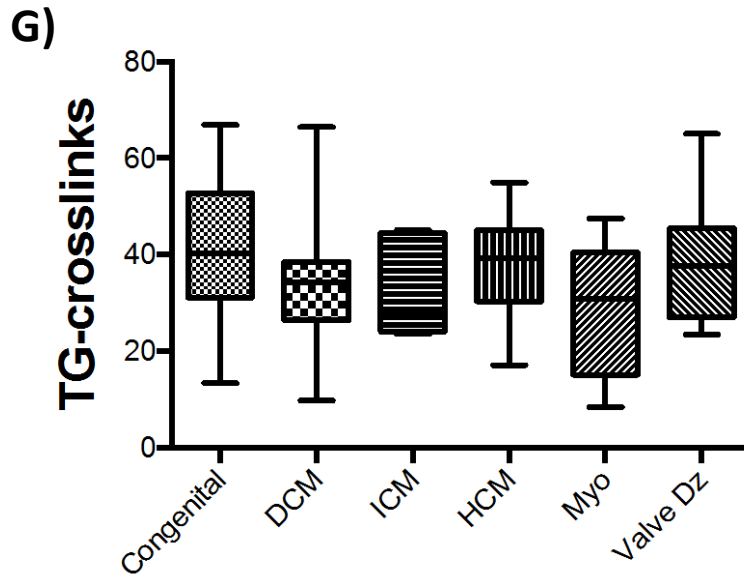

**Supplemental Figure V.** Results from human coronary artery TMA. **A**, Significant fibrosis was present in samples and %Fibrosis (scored using the Aperio software) did not correlate with age or **B**, disease; **C**, Plaque was present in all the samples; plaque size was scored by a pathologist at the Johns Hopkins University School of Medicine and did not correlate with age or **D**, disease; **E**, TG2; **F**, Fibronectin; and **G**, TG-crosslinks were highly expressed in the vascular media and did not correlate with disease.
